# Supplementary material for: A comparison of blood gases, biochemistry, and hematology to ecomorphology in a health assessment of pinfish ( Lagodon rhomboides)
Source: PeerJ journal article supplement (doi:10.7717/peerj.2262), 2016-08-09

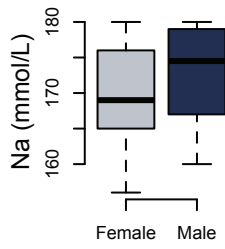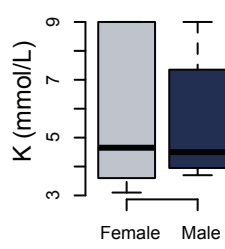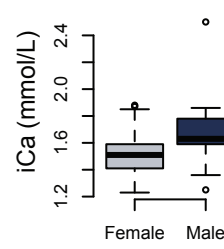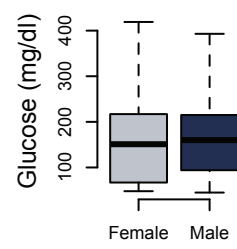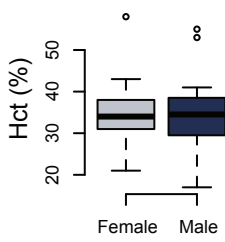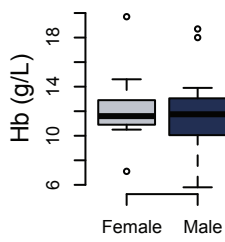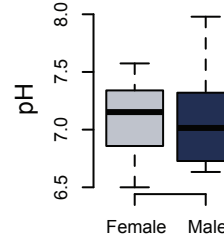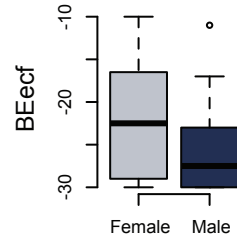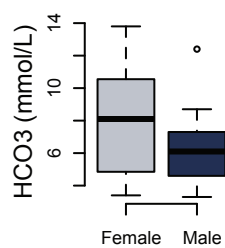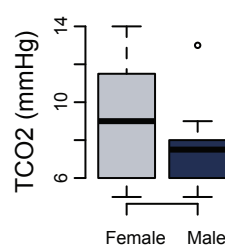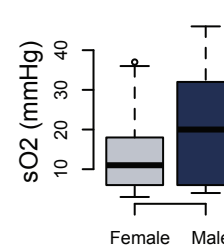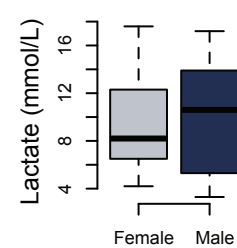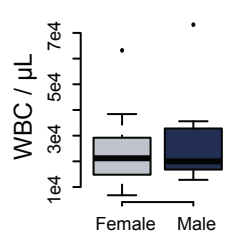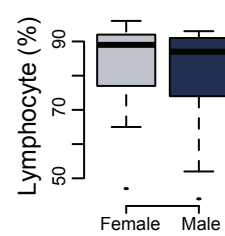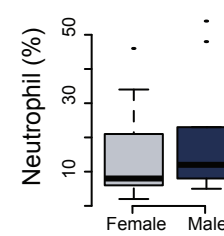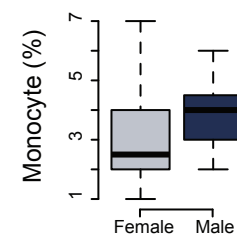

Supplement: Collinsetal_FigureS1.pdf [file Collinsetal_FigureS1.pdf]
