# Supplementary material for: A comparison of blood gases, biochemistry, and hematology to ecomorphology in a health assessment of pinfish (Lagodon rhomboides)
Source: PeerJ. 2016 Aug 9;4:e2262. doi: 10.7717/peerj.2262 (PMC4991879; doi:10.7717/peerj.2262)
Supplement: Data S1 [file peerj-04-2262-s001.xlsx]

## Sheet: Sheet1
Fish #	BW (g)	Blood Volume (ml)	Na	K	iCa	Glucose	Hct	Hb	pH	PCO2	PO2	BEecf	HCO3	TCO2	sO2%	Lactate	PCV	TS	Total WBC:	Neutrophils	Lymphocytes	Monocytes
1	14	0.15	174	4.7	1.75	118	27	9.2	6.944	18.7	41	-28	4	<5	48	6.9	40
2	30	0.35	167	4	1.89	149	25	8.5	7.032	23.8	34	-24	6.3	7	43	5.3	46	6.2	29400	13	87
3	38	0.25	>180		1.74	74			6.924	20.9	18	-28	4.3	<5	11	8.2	68	7.8	26200	46	47	7
4	63	0.23	167	3.8	1.7	248	41	13.9	7.074	24.4	23	-23	7.1	8	24	5.1	80		20000	6	91	3
5	74	0.22	166	3.6	1.72	61	20	6.8	7.161	19.4	12	-22	6.9	7	9	2.6	38			**These weren't pinfish
6	67	0.2	170	3.9	1.84	83	20	6.8	7.067	16.3	10	-26	4.7	5	6	2.2	38
7	11	0.1	>180		1.53	155			7.135	24.9	22	-21	8.4	9	26	16.2	60	5.4	28400	7	92	1
8	14	0.1	179	6.3	1.67	219	41	13.9	6.993	25	17	-25	6.1	7	12	16.1	60		30400	13	87
9	113	0.2	160	7.8	1.69	63	17	5.8	6.869	24.2	23	-29	4.4	5	16	3.3	36		17600	54	44
10	22	0.2	166	4.9	1.54	165	33	11.2	7.178	31.8	9	-17	11.8	13	6	3.6	72
11	24	0.17	>180		1.69	72			7.042	38.5	6	-20	10.5	12	3	11.1	66
12	74	0.22	156	>9.0	1.61	64	34	11.6	6.748	36.3	10	< -30	5	6	4	4.2	72
13	93	0.2	168	>9.0	1.95	94	36	12.2	6.537	47.1	<5	<-30	4	5		9.5	58
14	67	0.2	173	>9.0	2	52	31	10.5	6.503	58.5	<5	<-30	4.6	6		11.9	52
15	89	0.23	166	>9.0	1.69	48	21	7.1	6.747	34	33	<-30	4.7	6	24	7.8	45
16	135	0.21	162	3.1	1.35	401	37	12.6	7.23	23.9	25	-18	10	11	37	13.3	50	9
17	86	0.21	>180		>2.50	208			6.542	38.6	<5	<-30	3.3	<5		13.9	43	4
18	87	0.18	>180		1.53	240			7.13	17.5	27	-23	5.8	6	36	14.4	48
19	114	0.2	179	5.7	1.7	84	29	9.9	6.694	37.7	16	<-30	4.6	6	6	11.9	49
20	148	0.125	158	8.8	1.96	53	38	12.9	6.592	35.3	<5	<-30	3.4	<5		7.4	62
21	116	0.25	179	6.9	1.8	45	55	18.7	6.618	58.4	<5	<-30	6	8		16.4
22	80	0.26	175	>9.0	1.97	130	53	18	6.523	66.9	<5	<-30	5.5	8		17.2	78
23	100	0.25	177	>9.0	1.99	106	58	19.7	<6.5	63	5					17.6
24	58	0.23	166	3.4	1.59	151	31	10.5	7.266	26	15	-15	11.8	13	16	4.9	52
25	81	0.18	172	4.9	1.31	195	43	14.6	7.377	23.4	11	-11	13.7	14	12	14.1	54
26	25	0.25	163	4.1	1.59	340	18	6.1	7.218	31.9	24	-15	13	14	33	14.7
27	106	0.2	174	4.6	1.44	289	34	11.6	7.21	18.8	9	-20	7.5	8	6	16.9	44
28	76	0.23	160	3.7	1.33	393	30	10.2	7.505	15.6	17	-11	12.4	13	32	10.7	36
29	87	0.2	157	3.4	1.36	419	34	11.6	7.464	19.2	8	-10	13.8	14	8	9.9	58
30	59	0.18	176	4.6	1.48	197	33	11.2	7.393	17.4	<5	-14	10.6	11		12.3	42
31	69	0.25	164	4.2	1.47	171	32	10.9	7.325	16.8	7	-17	8.7	9	6	9.1	42
32	17	0.2	167	4.3	1.72	106	21	7.1	7.152	22.5	33	-21	7.9	9	49	2	30
33	83	0.2	165	3.8	1.63	226	34	11.6	7.103	24.6	19	-22	7.7	8	18	6.4	49	6.2
34	90	0.26	180	4.4	1.69	141	36	12.2	6.917	24.6	31	-28	5	6	30	4.7	51	5.1
35	135	0.2	169	3.9	1.6	67	41	13.9	6.878	48.8	11	-24	9.1	11	5	6.8	60
36	138	0.22	178	3.9	1.79	199	35	11.9	6.892	38	9	-26	7.3	8	4	11.9	48
37	92	0.32	169	4.7	1.54	217	37	12.6	6.995	34.8	11	-23	8.5	10	6	6.5	62
38	78	0.38	>180		1.76	215			6.876	33.6	43	-27	6.2	7	46	10.5	48
39	69	0.38	168	3.6	1.5	165	31	10.9	7.16	21.6	10	-21	7.7	8	7	4.6	47
AVG:	74.9231	0.220128	168.788	4.62963	1.66079	164.692	33.5152	11.4	7.00037	30.8385	18.4062	-21	7.42895	8.76471	19	9.54103	52.3333	6.243
